1 **A Clinical Consensus Treatment Algorithm for Patients with High-tone Pelvic Floor**  
2 **Dysfunction: a Multidisciplinary Delphi Study**

3  
4 Michele Torosis MD<sup>1</sup>, Erin Carey MD<sup>2</sup>, Kristin Christensen DPT<sup>3</sup>, Melissa R. Kaufman MD PhD<sup>4</sup>,  
5 Kimberly Kenton MD<sup>5</sup>, Rhonda Kotarinos DPT<sup>6</sup>, H. Henry Lai MD<sup>7</sup>, Una Lee MD<sup>8</sup>, Jerry L. Lowder  
6 MD, MSc<sup>9</sup>, Melanie Meister MD<sup>10</sup>, Theresa Spitznagle DPT<sup>11</sup>, Kelly Wright MD<sup>3</sup>, A. Lenore  
7 Ackerman MD PhD<sup>12</sup>

8  
9 <sup>1</sup>Department of Obstetrics and Gynecology, UCLA, Los Angeles, CA, <sup>2</sup>Department of Obstetrics and Gynecology,  
10 UNC, Chapel Hill, NC, <sup>3</sup>Cedars-Sinai Medical Center, Los Angeles, CA <sup>4</sup>Department of Urology, Vanderbilt, Nashville,  
11 TN, <sup>5</sup>Department of Obstetrics and Gynecology, University of Chicago, Chicago, IL, <sup>6</sup>Kotarinos Physical Therapy, Lake  
12 Zurich, IL, <sup>7</sup> Division of Urologic Surgery, Departments of Surgery and Anesthesiology, Washington University, Saint  
13 Louis, MO, <sup>8</sup>Department of Urology, Virginia Mason, Seattle, WA, <sup>9</sup>Department of Obstetrics and Gynecology,  
14 Washington University, Saint Louis, MO, <sup>10</sup>Obstetrics and Gynecology, University of Kansas, Kansas City, KS,  
15 <sup>11</sup>Washington University, Saint Louis, MO, <sup>12</sup>Department of Urology, UCLA, Los Angeles, CA

16  
17 **Short Title: A Consensus Treatment Algorithm for High-tone Pelvic Floor Dysfunction**

18  
19 **Conflict of Interest:** A.L. Ackerman receives grant funding from Medtronic, Inc. and  
20 MicrogenDx. A.L. Ackerman is an advisor for Abbvie and Watershed Medical.

21  
22 **Source of Funding:** No funding was involved in this paper

23  
24 Corresponding Author:

25 A. Lenore Ackerman  
26 10833 Le Conte Ave, Box 951738  
27 Los Angeles, CA 90095-1738  
28 Phone: 833-825-2974

29 [AAckerman@mednet.ucla.edu](mailto:AAckerman@mednet.ucla.edu)

30 Word Count: 2795

31  
32 **Acknowledgments:** The study team members acknowledge with gratitude the panelists who  
33 completed the Delphi surveys.

34  
35 **Keywords** (alphabetized, 10 words): chronic pelvic pain, high-tone pelvic floor dysfunction,  
36 myofascial pelvic pain, pelvic floor physical therapy, treatment algorithm

37  
38

## 39 **AUTHOR SUMMARY**

### 40 **Why was this study done?**

41 High tone pelvic floor dysfunction is a highly prevalent neuromuscular disorders causing a range  
42 of lower urinary tract and defecatory symptoms, sexual dysfunction, and pelvic pain.

43 Currently, there is no consensus or accepted clinical guidance to direct the management of  
44 these patients.

### 45 **What did the researchers do and find?**

46 Experts in urology, urogynecology, minimally invasive gynecology, and pelvic floor physical  
47 therapy generated a set of consensus practice statements to help guide the management of  
48 HTPFD using a rigorous Delphi process.

49 Four tiers of treatment, with pelvic floor physical therapy as the first line treatment, followed  
50 by vaginal muscle relaxants, tender point injections, and/or cognitive behavioral therapy as  
51 second line, pelvic floor trigger point injection as third-line, and sacral neuromodulation as  
52 fourth line, were recommended for HTPFD management.

53 Exceptions to sequential progression through this algorithm may be needed for patients with  
54 limited regional or financial access to the recommended treatments.

### 55 **What do these findings mean?**

56 A clinical care pathway for high-tone pelvic floor dysfunction will enable more effective care of  
57 patients and empower future studies to measure the effectiveness of each treatment option in  
58 a more systematic fashion.

59

60 **ABSTRACT**

61 **BACKGROUND:** High-tone pelvic floor dysfunction (HTPFD) is a neuromuscular disorder of the  
62 pelvic floor characterized by non-relaxing pelvic floor muscles, resulting in lower urinary tract  
63 and defecatory symptoms, sexual dysfunction, and pelvic pain. Despite affecting 80% of women  
64 with chronic pelvic pain, there are no uniformly accepted guidelines to direct the management  
65 of these patients. We sought to develop evidence- and consensus-based clinical practice  
66 guidelines for management of HTPFD.

67 **METHODS AND FINDINGS:** A Delphi method of consensus development was used, comprising  
68 three survey rounds administered anonymously via web-based platform (Qualtrics® XM) to  
69 national experts in the field of HTPFD recruited through targeted invitation between September  
70 and December 2021. Twelve experts participated with backgrounds in urology, urogynecology,  
71 minimally invasive gynecology, and pelvic floor physical therapy (PFPT) participated. Panelists  
72 were asked to rate their agreement with rated evidence-based statements regarding HTPFD  
73 treatment. Statements reaching consensus were used to generate a consensus treatment  
74 algorithm. A total of 31 statements were reviewed by group members at the first Delphi round  
75 with 10 statements reaching consensus. 28 statements were reposed in the second round with  
76 17 reaching consensus. The putative algorithm met clinical consensus in the third round. There  
77 was universal agreement for PFPT as first-line treatment for HTPFD. If satisfactory symptom  
78 improvement is reached with PFPT, the patient can be discharged with a home exercise  
79 program. If no improvement after PFPT, second line options include trigger or tender point  
80 injections, vaginal muscle relaxants, and cognitive behavioral therapy, all of which can also be  
81 used in conjunction with PFPT. Onabotulinumtoxin A injections should be used as third line with

82 symptom assessment after 2-4two to four weeks. There was universal agreement that sacral  
83 neuromodulation is fourth line intervention. The largest identified barrier to care for these  
84 patients is access to PFPT. For patients who cannot access PFPT, experts recommend at-home,  
85 guided pelvic floor relaxation, self-massage with vaginal wands, and virtual PFPT visits.

86 **CONCLUSIONS:** A stepwise approach to the treatment of HTPFD is recommended, with patients  
87 often necessitating multiple lines of treatment either sequentially or in conjunction. However,  
88 PFPT should be offered first line.

89 **INTRODUCTION**

90 Chronic pelvic pain (CPP) is estimated to affect one quarter of women and cost the US  
91 healthcare system more than \$5.8 billion annually. (1) (2) High-tone pelvic floor disorder  
92 (HTPFD), a chronic pelvic floor disorder characterized by tight, weakened, and/or painful pelvic  
93 floor muscles, is present in 60 to 90% of women with CPP. (1) (3) (4) Tension within the muscle  
94 interferes with its dynamic physiologic action, preventing appropriate coordination,  
95 contraction, and relaxation. This may be associated with a wide range of genitourinary  
96 complaints, including discomfort, lower urinary tract symptoms (LUTS), defecatory dysfunction,  
97 and dyspareunia. HTPFD can be the sole cause for pain and genitourinary complaints or can co-  
98 exist with other pelvic pain disorders, such as vulvodynia or endometriosis; however, it  
99 frequently goes both unrecognized and untreated, contributing to the poor outcomes often  
100 seen in these conditions.

101  
102 Recognition and diagnosis of HTPFD is complicated by its wide spectrum of clinical  
103 presentations and symptomatic overlap with other gynecologic, urologic and colorectal  
104 syndromes. While chronic pain is a common presentation, many patients with HTPFD may seek  
105 medical care for LUTS or defecatory dysfunction as their primary complaint. A growing body of  
106 literature indicates that increased pelvic floor tone underlies many urinary, gastrointestinal,  
107 and sexual complaints, even in the absence of pain. (5) The etiology of HTPFD is equally broad,  
108 ranging from idiopathic, potentially incited by poor toileting habits or triggered by visceral  
109 dysfunction, including endometriosis or interstitial cystitis/bladder pain syndrome (IC/BPS), or  
110 musculoskeletal injuries, such as sacroiliac joint dysfunction or hip osteoarthritis, all highly

111 prevalent conditions. Clinical identification of increased pelvic floor tone is subjective and  
112 provider-dependent, relying on discriminate vulvar, vaginal, and rectal examination to identify  
113 hypertonicity of the levator ani and obturator internus musculature. (6) (7)  
114  
115 Beyond the diagnosis, there is little guidance on treatment pathways. While multiple clinical  
116 trials and observational studies have sought to establish the efficacies of a range of treatments  
117 for HTPFD, there is considerable variability in the level of peer-reviewed evidence. In addition,  
118 head-to-head studies of therapeutic approaches are lacking, making it challenging for many  
119 providers to determine an effective course of treatment, particularly when access to certain  
120 therapeutic modalities, such as pelvic floor physical therapy (PFPT), can be limited. This lack of  
121 guidance often leaves patients unable to access effective treatment or make informed decisions  
122 surrounding their care.  
123  
124 In the absence of guidelines or strong level I evidence, we sought to generate a treatment  
125 algorithm based on using the Delphi method, a formal, systematic qualitative methodology, (8)  
126 to compile expert opinion statements supported by the available literature pertinent to the  
127 treatment of HTPFD. Compilation of these consensus statements into the first proposed  
128 comprehensive treatment algorithm for women with HTPFD sought to facilitate clinician's  
129 efforts to provide the best treatment options for these frequently debilitated patients.  
130

131 **METHODS**

132 *Design and Participants*

133 The HTPFD treatment consensus was developed using a modified Delphi process. After  
134 exemption from Institutional Review Board approval (UCLA IRB#21-001399), we identified a  
135 range of practitioners with expertise in the diagnosis and management of HTPFD. Ten to 15  
136 experts have been described as a minimum number for Delphi methodology to yield sufficient  
137 results and ensure validity. (9) (10) Initial screening identified 32 practitioners who were either  
138 academic clinicians with a track record of publications or academic speaking on HTPFD and/or  
139 experts who had published online, book, and social media informational materials on HTPFD.  
140 Twenty-five of these practitioners confirmed that HTPFD currently comprised at least 20% of  
141 their patient population; 12 of these specialists agreed to participate, reflecting geographic  
142 diversity and balanced representation of the multiple specialties.

143

144 Prior to initiating the Delphi process, the intended scope of the practice algorithm was outlined,  
145 and group members were asked to review a panel of literature containing pertinent clinical  
146 trials and systematic reviews. The definition of HTPFD was provided to the participants as per  
147 the International Continence Society. (11) Web-based software Qualtrics (Provo, UT) was used  
148 to administer confidential surveys to participants.

149

150 *Delphi Study*

151 The Delphi method, an iterative process that uses a systematic progression of repeated rounds  
152 of voting, is an effective process for determining expert group consensus where there is little



153 definitive evidence. (8) The process was conducted in three phases which took place between  
154 September and December 2021 (**Figure 1**). To develop the initial statements, a literature review  
155 was conducted to identify current evidence regarding options and efficacy of treatments for  
156 HTPFD. Relevant information was collected from studies regarding best practices on how to  
157 treat HTPFD, which were formulated by the study team into 31 statements for the Round 1  
158 questionnaire. Survey questions used a 5-point Likert scale for participants to rate their level of  
159 agreement with questions. (12) There was also opportunity for short comments explaining their  
160 rationale for agreement or disagreement with statement. Consensus was defined as 70% or  
161 more of the members voting in agreement. (13) (14) Statements with  $\geq 70\%$  of agreement  
162 (either strongly agree and agree; or strongly disagree and disagree) were interpreted as  
163 “appropriate” or “inappropriate” to include in the guidelines, respectively. Statements that did  
164 not meet consensus were revised and reposed to the group in the next round. New concepts  
165 that were presented by at least three individual experts were incorporated into the next round  
166 of statements.

167  
168 In phase two, the revised Round 2 questionnaire was sent to all participants and again  
169 participants were asked to rate level of agreement on a 5-point Likert scale. Results from Round  
170 2 were analyzed, and a treatment pathway was developed by the study team based on  
171 consensus statements (Round 3). In phase three, the provisional treatment pathway was  
172 presented to experts and qualitative and quantitative agreement was captured. Experts were  
173 also asked additional qualitative questions about how they advise patients in resource limited  
174 settings.

175

176 *Statistical analysis*

177 Aggregated data were stored and analyzed in Microsoft Excel for Mac (V16.16.16; Microsoft

178 Corporation, Redmond, WA).

179

180 **RESULTS**

181 A total of 4 American Board of Urology (ABU)-certified female pelvic medicine and  
182 reconstructive surgery (FPMRS) urologists, 3 American Board of Obstetrics and Gynecology  
183 (ABOG)-certified urogynecologists, 2 minimally invasive gynecologists, and 3 American Board of  
184 Physical Therapy Specialties (ABPTS)-certified Women’s Clinical Health Specialist physical  
185 therapists participated in this effort. The treatment consensus was developed and confirmed in  
186 an electronic, three-phase, modified Delphi process. A total of 31 statements were reviewed by  
187 the HTPFD expert group members at the first Delphi round with 10 statements reaching  
188 consensus. The 21 statements that did not reach consensus were reviewed and revised to  
189 clarify ambiguities. Some statements were divided into two statements to aid in clarification. In  
190 total, 28 statements were included in the second Delphi survey and 17 of these statements  
191 reached consensus (**Table 1**). After the second round, it was determined that the statements  
192 that had not reached consensus were because of absence of evidence rather than ambiguity in  
193 wording (**Appendix 1**). A treatment pathway (**Figure 2**) was generated and evaluated by the  
194 group members in the third Delphi survey, which met clinical consensus.

195  
196 Ultimately, the experts reached consensus that HTPFD treatment should be arranged into four  
197 tiers based on available data and perceived effectiveness and invasiveness of the therapy.  
198 Treatment approaches that did not reach expert consensus were not included in the final  
199 treatment algorithm. Experts unanimously agreed that after the diagnosis of HTPFD is made,  
200 patients should be referred to PFPT and counseled on home-based options for symptom  
201 control. Behavioral interventions include timed voiding, urge suppression, and dietary

202 modifications for bowel and bladder symptoms. Home-based stretching exercises with the goal  
203 of pelvic floor relaxation and yoga should be routinely recommended. At the time of diagnosis  
204 an evaluation should rule out any extra-pelvic myofascial contributions, such as lower extremity  
205 joint or spinal pathology, and if identified, a referral should be made to the appropriate  
206 specialists for management in conjunction with the pelvic floor measures.

207

### 208 *Pelvic Floor Physical Therapy (PFPT)*

209 There was unanimous consensus that PFPT should be offered as first-line treatment for HTPFD.  
210 Consensus was met that PFPT should be employed for a least 8-12 weeks, noting that patients  
211 with a longer symptom history may require a greater number of sessions to appreciate  
212 improvement with PT. PFPT is aimed at pelvic floor relaxation, not strengthening, employing  
213 techniques such as myofascial release and dry needling. Following the initial treatment, women  
214 who improve with PFPT may continue therapy until the symptoms stabilize or resolve. Patients  
215 may then be discharged with self-management techniques for symptom maintenance and for  
216 the treatment of minor flares. After 4-6 months of stable symptoms, patients may follow up on  
217 an as-needed basis. Experts agreed that the goal of PFPT is to facilitate initial improvements  
218 and provide sufficient training to allow patients to manage symptoms and minor flares with  
219 home-based treatment.

220

221 Experts agreed that second-line therapies, such as tender point injection (TPI) and vaginal  
222 suppositories, can be added to PFPT in patients whose progress has plateaued without  
223 sufficient improvement or who are not initially able to tolerate therapy. Experts indicated

224 techniques such as biofeedback and dry needling may be employed at the discretion of the  
225 physical therapist and do not need to be specifically requested by the clinician. If symptoms do  
226 not improve with PFPT, then an alternative diagnosis should be considered before progression  
227 to second-line options.

228

## 229 Second Line Therapies

### 230 *Vaginal Muscle Relaxants*

231 Diazepam was the most prescribed vaginal suppository with the goal of muscle relaxation,  
232 however other viable options include baclofen, cyclobenzaprine and tizanidine. Vaginal  
233 administration was preferred by the experts over oral administration.

234

### 235 *Tender Point Injections (TPI)*

236 A myofascial trigger point is a tender nodule within a taught band and is more recently being  
237 referred to as tender point with increased tone. (15) Tender points often accompany HTPFD,  
238 however not all hypertonic muscles have tender points and thus this therapy is most useful for  
239 patients with identifiable tender points on exam. To identify an appropriate site for injection,  
240 pelvic floor muscles are palpated perpendicular to its fiber orientation for a taut band. The taut  
241 band is then palpated within its fiber direction for the most tender spot that reproduces or  
242 refers pain. Injection of local anesthetic is targeted at this site. Consensus was reached that a  
243 plain local anesthetic (e.g., 0.25%-0.5% bupivacaine) should be used. The majority of experts  
244 did not recommend adding steroid to the injection mixture. This is helpful for patients who  
245 cannot tolerate PFPT due to a high level of pain or who have plateaued with PFPT. The goal of

246 the TPIs is to downregulate the guarding reflex and allow for further relaxation of the muscle.

247 While response to TPI can be a good prognostic sign, if a patient does not respond to an initial

248 injection, repeated injections are not warranted. Experts did not advocate isolated pudendal

249 blocks in isolation were useful for treating HTPFD.

250

251 *Cognitive Behavioral Therapy (CBT)*

252 CBT has been shown to make a clinically meaningful improvement in pain and psychosexual

253 function in patients with vestibulodynia and other chronic pain conditions thus experts

254 supported its use in HTPFD. (16) (17)

255

256 Third-Line Therapy

257 *OnabotulinumtoxinA (BTXA)*

258 Experts reached consensus that injection with onabotulinumtoxinA is helpful for women with

259 refractory myofascial pelvic pain and should be the third-line option for women who have been

260 minimally responsive to other therapies. Experts reached consensus that BTXA injections should

261 be targeted at the myofascial sources of hypertonicity or pain, rather than administered in a

262 single template fashion, and that bilateral injection is preferred over unilateral. Repeat

263 injections is not recommended if there is no response to the first injection.

264

265 Fourth-Line Therapy

266 *Sacral Neuromodulation (SNM)*

267 Experts anecdotally reported that SNM for urinary urgency and frequency in the setting of  
268 HTPFD is sometimes effective to relieve pain, as well as LUTS. Given the paucity of data,  
269 however, experts felt SNM should only be used in patients who have failed other therapies and  
270 should not be recommended in the absence of refractory frequency and urgency as SNM used  
271 primarily for HTPFD would be an off-label use.

272

273

274 **DISCUSSION**

275 Here, we present a first-of-its-kind treatment algorithm for patients with HTPFD. While the first  
276 line option of PFPT easily met consensus among our panel of national experts, later lines of  
277 therapy with less evidence were supported based on expert opinion and anecdotal success.  
278 Specifics regarding technique and dosing of second- and third-line therapies did not meet  
279 consensus due to lack of high-quality evidence and heterogeneity in practice patterns. This  
280 highlights areas where further research is needed to help refine this treatment algorithm and  
281 improve the care of HTPFD.

282

283 While PFPT has the most high-quality data to support its use, there are challenges with its  
284 application. Most patients cannot identify an appropriate provider, experience long waits, or  
285 undergo inadequate or inappropriate treatment. Inadequately trained therapists may focus on  
286 muscle strengthening techniques, which exacerbates HTPFD. (18) Finding a skilled provider is  
287 challenging as only 305 specialist therapists in the U.S. are registered on the American Physical  
288 Therapy Association website; multiple states have only a few board-certified therapists. Uptake  
289 and attendance with prescribed PFPT for HTPFD is poor, between 15-40%. (19) (20) Even when  
290 delivered by well-trained personnel, PFPT is only effective for two-thirds of patients. (6) In  
291 addition, patients need to be physically and cognitively intact and able to actively participate in  
292 such therapies. Multiple barriers to starting and completing PFPT have also been identified, and  
293 there are no accepted therapeutic equivalents for patients who cannot access physical therapy,  
294 cannot participate in self-care, or fail to respond to this approach. (21)

295



296 Despite limited guidance regarding formulation, dose, and administration, intravaginal  
297 diazepam, a second-line treatment option in the algorithm, is increasingly being used off-label  
298 for HTPFD management. (22) (23) Dosing has been adapted from oral dosing and experts felt a  
299 starting dose of 5-10 mg vaginally was appropriate (**Table 2**). Studies have shown that vaginally  
300 administered diazepam results in lower peak serum plasma concentrations, longer half-life, and  
301 fewer side effects, supporting the recommendation for vaginal over oral administration. (23)  
302 (24) As there are no commercially available vaginal diazepam formulations, and compounded  
303 medications are typically not covered by insurance, this treatment method can pose a financial  
304 barrier for some patients. As the absorption of oral tablets placed vaginally is poor and  
305 therapeutic benefit is reported to be less effective, it was not felt to be a universally acceptable  
306 alternative. (25) Until insurance coverage improves for compounded vaginal preparations, this  
307 therapy is not a universally accessible option.

308  
309 Psychosocial factors are well known to play a role in chronic pain, dictating severity and  
310 prognosis. Comorbid depression and anxiety among women with chronic pelvic pain are  
311 reported as high as 66%. (26) In addition, central sensitization, or the amplification of the  
312 central nervous system response to peripheral input, may also occur in patients who experience  
313 chronic pain. The combination of these factors highlights how CBT may be an acceptable  
314 treatment option for pain due to HTPFD and pain-related depression and anxiety. Although  
315 studies of CBT in patients with HTPFD are lacking, strong evidence for its benefits in a wide  
316 range of chronic pain disorders and low risk of harm make CBT a reasonable second-line  
317 therapy.

318

319 While off-label pelvic floor BTXA injection has been used successfully for HTPFD, there is a wide  
320 variation in its use and application. Clinically significant reduction in pain score and resting  
321 muscle tone are observed across studies despite wide variability in dose, number of injection  
322 sites, and method of injection. (27) Experts indicated injections should be bilateral and targeted  
323 to hypertonic muscles using 10-40 units per muscle group. However, there remain many  
324 unanswered questions regarding optimal injection technique, identification of injection sites  
325 and injection amount that needs further investigation with larger randomized controlled trials  
326 before definitive recommendations on BTXA can be put forth.

327

328 There are no studies specifically evaluating the use of SNM for the treatment of HTPFD. SNM's  
329 therapeutic effect in treating HTPFD is hypothesized to be related to reviving brainstem  
330 autoregulation and reset the function of the pelvic floor as evidence by its utility in patients  
331 with Fowler's syndrome. (28) Furthermore, SNM improves pain scores between 35 to 52% in  
332 patients with non-IC/BPS chronic pelvic pain, including those with HTPFD. (29) While the expert  
333 panel did not feel SNM should be used in patients without urinary or fecal urgency and  
334 frequency, data suggest there may be a benefit of SNM for HTPFD alone even in the absence of  
335 these complaints; further efforts are needed to evaluate this indication.

336

337 Recognizing that the first- and second-line therapies listed in the algorithm are only accessible  
338 in resource-rich settings, we specifically asked experts for options in resource-limited settings.  
339 Virtual PFPT has increased accessibility in recent years, and experts felt this was an acceptable

340 alternative for patients with no or limited in-person options. The caveat to this is that it must be  
341 clearly communicated that therapy should focus on pelvic floor relaxation. Experts also felt  
342 progression straight to vaginal muscle relaxants and TPIs was a reasonable option. Overall,  
343 experts reiterated their frustration that patients experience numerous barriers to obtaining  
344 even these limited options, and improved insurance coverage and access to care is needed to  
345 make these therapies more accessible. Sociodemographic inequalities have been highlighted as  
346 barriers to pain management access and may be even greater in patients with HTPFD. (30)

347  
348 The strength of this novel consensus algorithm for the treatment of HTPFD derives from broad  
349 experiences of an expert panel with diverse medical specialties and geographic locations,  
350 strengthening the generalizability of this algorithm. However, this algorithm is limited in the  
351 ability to provide specific guidance on the application of the therapeutics beyond PFPT due to  
352 poor quality research. Even retrospective studies on an HTPFD population are limited by no  
353 specific ICD10 diagnosis codes for HTPFD. Without wider recognition of this condition,  
354 improvements in the diagnostic recognition and therapeutic offerings will continue to stagnate.

355  
356 With this expert-driven treatment algorithm, patients can now progress through treatment in a  
357 systematic fashion. This will give providers more confidence when recommending therapies  
358 and patients more confidence that additional options are available if they do not respond or  
359 cannot access first-line options. This will also allow for further studies on responses to therapy,  
360 improving the quality of data on these treatment decisions. In turn, this algorithm can be  
361 revised and updated as research develops in this field.

362 *Conclusion:*

363 In summary, this algorithm was created by a diverse group of experts according to rigorous  
364 criteria to generate a consensus treatment pathway for HTPFD supported by available  
365 literature. PFPT is unanimously agreed upon to be first-line treatment of this condition. The  
366 second-, third-, and fourth-line options are available for patients who do not adequately  
367 respond to PFPT. In general, the expert panel reached consensus that research on the  
368 treatment of HTPFD has been limited due by diagnostic challenges and poor awareness of this  
369 condition. With clear treatment recommendations, providers can guide patients through  
370 treatment of HTPFD in a more seamless manner, improving awareness, efficacy, outcomes and  
371 satisfaction with care.

372 **REFERENCES**

373

- 374 1. Chronic Pelvic Pain: ACOG Practice Bulletin, Number 218 2020 [135(3):e98-e09.  
375 doi:10.1097/AOG.0000000000003716]. Available from: [https://www.acog.org/clinical/clinical-](https://www.acog.org/clinical/clinical-guidance/practice-bulletin/articles/2020/03/chronic-pelvic-pain)  
376 [guidance/practice-bulletin/articles/2020/03/chronic-pelvic-pain](https://www.acog.org/clinical/clinical-guidance/practice-bulletin/articles/2020/03/chronic-pelvic-pain).
- 377 2. Mathias SD, Kuppermann M, Liberman RF, Lipschutz RC, Steege JF. Chronic pelvic pain:  
378 Prevalence, health-related quality of life, and economic correlates. *Obstetrics and gynecology*.  
379 1996;87(3):321-7.
- 380 3. Ross V, Detterman C, Hallisey A. Myofascial Pelvic Pain: An Overlooked and Treatable  
381 Cause of Chronic Pelvic Pain. *J Midwifery Womens Health*. 2021;66(2):148-60.
- 382 4. Westbay LC, Adams W, Kistner M, Brincat C, Bresler L, Yang LC, et al. Clinical Outcomes  
383 of a Multidisciplinary Female Chronic Pelvic Pain Program. *Female Pelvic Med Reconstr Surg*.  
384 2021;27(12):753-8.
- 385 5. Voorham-van der Zalm PJ, Lycklama ANGAB, Elzevier HW, Putter H, Pelger RCM.  
386 "Diagnostic investigation of the pelvic floor": a helpful tool in the approach in patients with  
387 complaints of micturition, defecation, and/or sexual dysfunction. *J Sex Med*. 2008;5(4):864-71.
- 388 6. Bedaiwy MA, Patterson B, Mahajan S. Prevalence of myofascial chronic pelvic pain and  
389 the effectiveness of pelvic floor physical therapy. *J Reprod Med*. 2013;58(11-12):504-10.
- 390 7. Faubion SS, Shuster LT, Bharucha AE. Recognition and management of nonrelaxing  
391 pelvic floor dysfunction. *Mayo Clin Proc*. 2012;87(2):187-93.
- 392 8. Meshkat B CS, Gethin G, et. al. Using an e-Delphi technique in achieving consensus  
393 across disciplines for developing best practice in day surgery in Ireland. *J Hosp Adm*. 2014;3(4).
- 394 9. Murphy MK, Black NA, Lamping DL, McKee CM, Sanderson CF, Askham J, et al.  
395 Consensus development methods, and their use in clinical guideline development. *Health*  
396 *Technol Assess*. 1998;2(3):i-iv, 1-88.
- 397 10. Giannarou L ZE. Using Delphi technique to build consensus in practice. *Int J Bus Sci Appl*  
398 *Manag*. 2014;9(2):65-82.
- 399 11. Messelink B, Benson T, Berghmans B, Bo K, Corcos J, Fowler C, et al. Standardization of  
400 terminology of pelvic floor muscle function and dysfunction: report from the pelvic floor clinical  
401 assessment group of the International Continence Society. *Neurourol Urodyn*. 2005;24(4):374-  
402 80.
- 403 12. Atkins D, Eccles M, Flottorp S, Guyatt GH, Henry D, Hill S, et al. Systems for grading the  
404 quality of evidence and the strength of recommendations I: critical appraisal of existing  
405 approaches The GRADE Working Group. *BMC Health Serv Res*. 2004;4(1):38.
- 406 13. Hasson F, Keeney S, McKenna H. Research guidelines for the Delphi survey technique. *J*  
407 *Adv Nurs*. 2000;32(4):1008-15.
- 408 14. T S. The Delphi Technique: An Adaptive Research Tool. *Br J Occup Ther*. 1998;61(4):153-  
409 6.
- 410 15. Frawley H, Shelly B, Morin M, Bernard S, Bo K, Digesu GA, et al. An International  
411 Continence Society (ICS) report on the terminology for pelvic floor muscle assessment.  
412 *Neurourol Urodyn*. 2021;40(5):1217-60.

- 413 16. Goldfinger C, Pukall CF, Thibault-Gagnon S, McLean L, Chamberlain S. Effectiveness of  
414 Cognitive-Behavioral Therapy and Physical Therapy for Provoked Vestibulodynia: A Randomized  
415 Pilot Study. *J Sex Med.* 2016;13(1):88-94.
- 416 17. Urits I, Callan J, Moore WC, Fuller MC, Renschler JS, Fisher P, et al. Cognitive behavioral  
417 therapy for the treatment of chronic pelvic pain. *Best Pract Res Clin Anaesthesiol.*  
418 2020;34(3):409-26.
- 419 18. Hoffman D. Central and peripheral pain generators in women with chronic pelvic pain:  
420 patient centered assessment and treatment. *Curr Rheumatol Rev.* 2015;11(2):146-66.
- 421 19. Woodburn KL, Tran MC, Casas-Puig V, Ninivaggio CS, Ferrando CA. Compliance With  
422 Pelvic Floor Physical Therapy in Patients Diagnosed With High-Tone Pelvic Floor Disorders.  
423 *Female Pelvic Med Reconstr Surg.* 2021;27(2):94-7.
- 424 20. Shannon MB, Genereux M, Brincat C, Adams W, Brubaker L, Mueller ER, et al.  
425 Attendance at Prescribed Pelvic Floor Physical Therapy in a Diverse, Urban Urogynecology  
426 Population. *Pm&R.* 2018;10(6):601-6.
- 427 21. Zoorob D, Higgins M, Swan K, Cummings J, Dominguez S, Carey E. Barriers to Pelvic Floor  
428 Physical Therapy Regarding Treatment of High-Tone Pelvic Floor Dysfunction. *Female Pelvic  
429 Med Re.* 2017;23(6):444-8.
- 430 22. Crisp CC, Vaccaro CM, Estanol MV, Oakley SH, Kleeman SD, Fellner AN, et al. Intra-  
431 vaginal diazepam for high-tone pelvic floor dysfunction: a randomized placebo-controlled trial.  
432 *Int Urogynecol J.* 2013;24(11):1915-23.
- 433 23. Stone RH, Abousaud M, Abousaud A, Kobak W. A Systematic Review of Intravaginal  
434 Diazepam for the Treatment of Pelvic Floor Hypertonic Disorder. *J Clin Pharmacol.* 2020;60  
435 Suppl 2:S110-S20.
- 436 24. Larish AM, Dickson RR, Kudgus RA, McGovern RM, Reid JM, Hooten WM, et al. Vaginal  
437 Diazepam for Nonrelaxing Pelvic Floor Dysfunction: The Pharmacokinetic Profile. *J Sex Med.*  
438 2019;16(6):763-6.
- 439 25. Hussain A, Ahsan F. The vagina as a route for systemic drug delivery. *J Control Release.*  
440 2005;103(2):301-13.
- 441 26. Siqueira-Campos VME, Da Luz RA, de Deus JM, Martinez EZ, Conde DM. Anxiety and  
442 depression in women with and without chronic pelvic pain: prevalence and associated factors. *J  
443 Pain Res.* 2019;12:1223-33.
- 444 27. Meister MR, Brubaker A, Sutcliffe S, Lowder JL. Effectiveness of Botulinum Toxin for  
445 Treatment of Symptomatic Pelvic Floor Myofascial Pain in Women: A Systematic Review and  
446 Meta-analysis. *Female Pelvic Med Reconstr Surg.* 2021;27(1):e152-e60.
- 447 28. Dasgupta R, Critchley HD, Dolan RJ, Fowler CJ. Changes in brain activity following sacral  
448 neuromodulation for urinary retention. *J Urol.* 2005;174(6):2268-72.
- 449 29. Mahran A, Baaklini G, Hassani D, Abolella HA, Safwat AS, Neudecker M, et al. Sacral  
450 neuromodulation treating chronic pelvic pain: a meta-analysis and systematic review of the  
451 literature. *Int Urogynecol J.* 2019;30(7):1023-35.
- 452 30. Knoebel RW, Starck JV, Miller P. Treatment Disparities Among the Black Population and  
453 Their Influence on the Equitable Management of Chronic Pain. *Health Equity.* 2021;5(1):596-  
454 605.  
455  
456

457

458

459

460

461

462 **Figure 1 – Diagrammatic Overview of Modified Delphi Process.** Multiple questionnaire rounds  
463 were sent to the panel of experts to work toward a consensus opinion. The participants were  
464 allowed additional free-text responses to help generate revised statements in subsequent  
465 rounds. In later rounds, information brought forth by other experts was also included to help  
466 refine consensus statements. After the third round, a final treatment algorithm was generated  
467 from the consensus statements and approved by all members.  
468

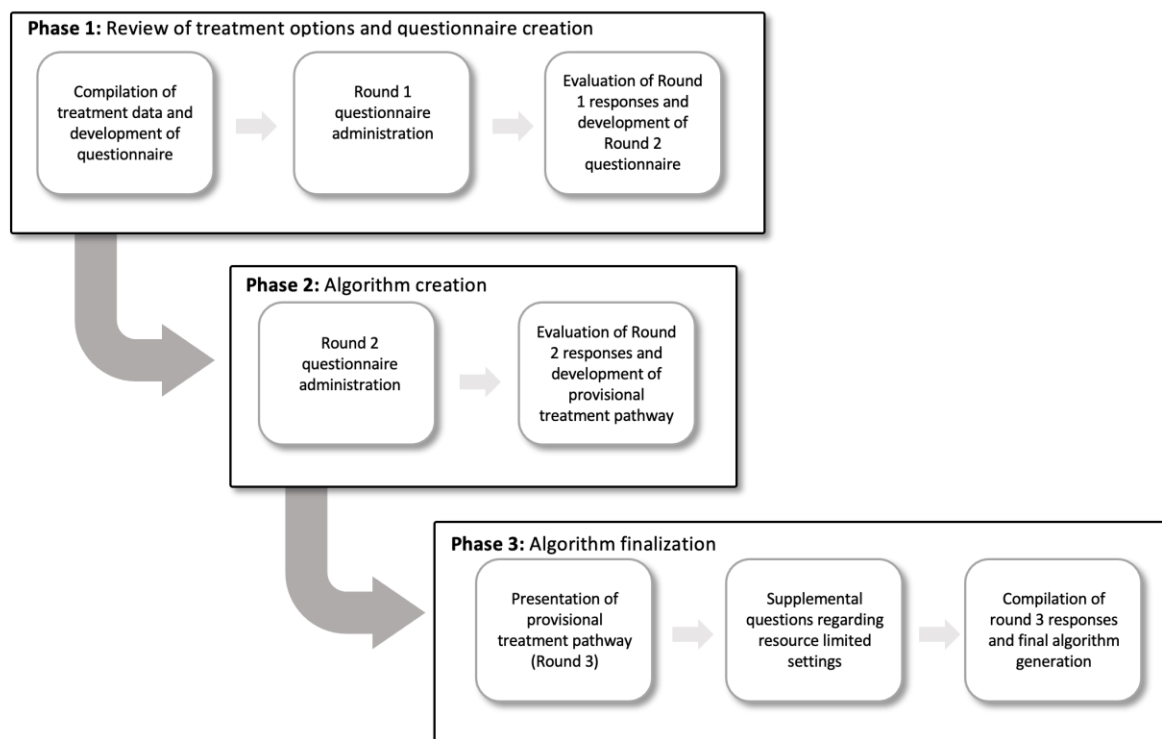

469 **Figure 1:** Diagrammatic overview of modified Delphi process



470 **Figure 2 – Treatment Algorithm for High Tone Pelvic Floor Dysfunction.** The consensus  
 471 statement regarding treatment approaches for HTPFD were organized into an algorithm with  
 472 levels of treatment ranging from least invasive and most evidence-based to more invasive  
 473 approaches with weaker supporting evidence.  
 474

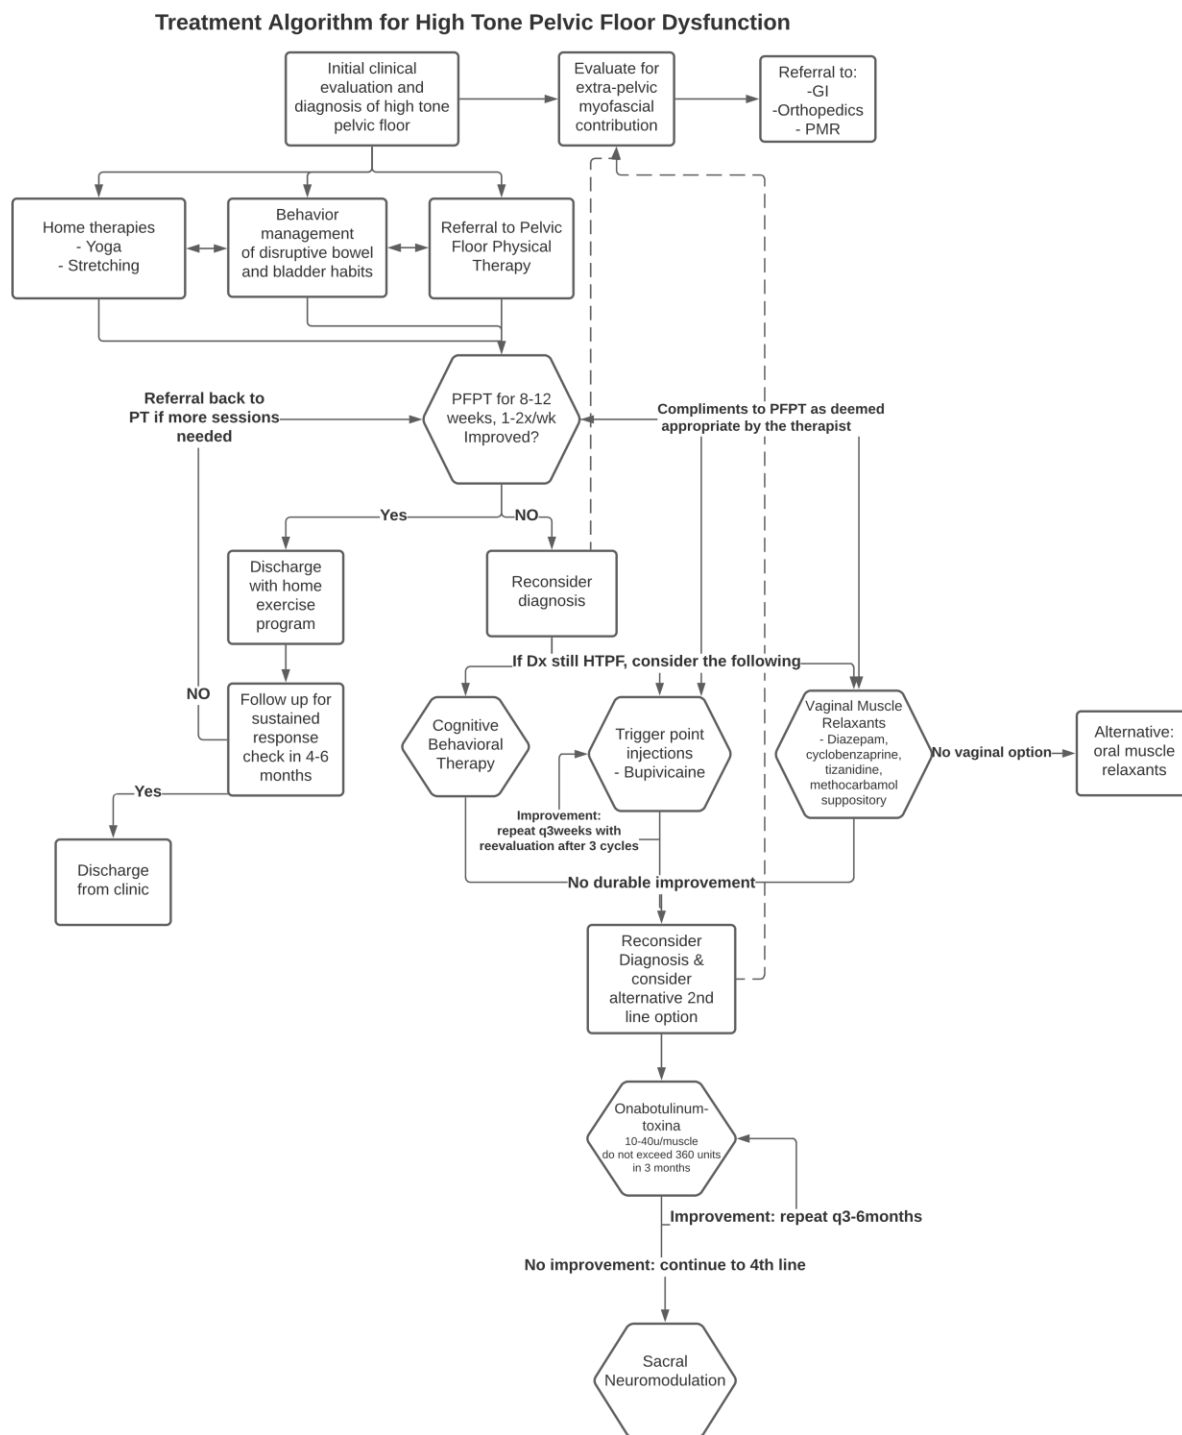

475  
 476



478 Table 1 – Statements That Met Consensus

| Statement                                                                                                                                                                                                                                                                                                                                                                                                                                                                                                                                                                                                                                                                                                                               | No. (%) Agreement (n=11) |
|-----------------------------------------------------------------------------------------------------------------------------------------------------------------------------------------------------------------------------------------------------------------------------------------------------------------------------------------------------------------------------------------------------------------------------------------------------------------------------------------------------------------------------------------------------------------------------------------------------------------------------------------------------------------------------------------------------------------------------------------|--------------------------|
| <i>Pelvic Floor Physical Therapy</i>                                                                                                                                                                                                                                                                                                                                                                                                                                                                                                                                                                                                                                                                                                    |                          |
| Pelvic floor physical therapy should be tried for 8-12 weeks before reassessment. Optimal treatment schedule would be 1-2 sessions per week for at least 8 weeks, ideally 12 weeks.                                                                                                                                                                                                                                                                                                                                                                                                                                                                                                                                                     | 11 (100)                 |
| Women with improvement and stabilization on PFPT should be discharged with a home exercise program to maintain improvement.                                                                                                                                                                                                                                                                                                                                                                                                                                                                                                                                                                                                             | 11 (100)                 |
| Women with improvement and stabilization on PFPT should be discharged with a home exercise program and follow up with MD or APP after 4-6 months to check for sustained response                                                                                                                                                                                                                                                                                                                                                                                                                                                                                                                                                        | 8 (73)                   |
| There was a mixed response on the role of biofeedback. Some believe it is considered a standard part of pelvic floor physical therapy and some feel it should be requested specifically by the clinician. There are promising studies to support biofeedback’s utility in HTPFD. The literature presents evidence for the efficacy and effectiveness of pelvic floor muscle training performed together with adjunctive therapies (biofeedback, vaginal cones, electrical stimulation) as being greater than pelvic floor exercises performed alone (or using behavioral therapy alone). Pelvic floor muscle surface electromyographic biofeedback does NOT need to be specifically requested by the clinician for patients with HTPFD. | 10 (91)                  |
| Pelvic floor muscle surface electromyographic biofeedback should be performed at the discretion of the physical therapist and does not need to be called out specifically in the HPTFD treatment algorithm.                                                                                                                                                                                                                                                                                                                                                                                                                                                                                                                             | 11 (100)                 |
| <i>OnabotulinumtoxinA</i>                                                                                                                                                                                                                                                                                                                                                                                                                                                                                                                                                                                                                                                                                                               |                          |
| Injection of onabotulinumtoxinA into hypertonic pelvic floor muscles should be used in conjunction to PFPT in women who do not achieve adequate improvement with PT alone.                                                                                                                                                                                                                                                                                                                                                                                                                                                                                                                                                              | 8 (73)                   |
| When using onabotulinumtoxinA in the pelvic floor, should a standard template injection or a targeted injection at hypertonic muscles be used? Targeted                                                                                                                                                                                                                                                                                                                                                                                                                                                                                                                                                                                 | 9 (82)                   |
| Should injections of onabotulinumtoxinA be performed unilateral or bilateral? Bilateral                                                                                                                                                                                                                                                                                                                                                                                                                                                                                                                                                                                                                                                 | 8 (73)                   |
| If no improvement with onabotulinumtoxinA after how many sessions do you move on to another therapy? 1-2                                                                                                                                                                                                                                                                                                                                                                                                                                                                                                                                                                                                                                | 10 (91)                  |

|                                                                                                                                                                                                                                                                                                                                                                                                                                                                                                                                                                                                                                                                                  |        |
|----------------------------------------------------------------------------------------------------------------------------------------------------------------------------------------------------------------------------------------------------------------------------------------------------------------------------------------------------------------------------------------------------------------------------------------------------------------------------------------------------------------------------------------------------------------------------------------------------------------------------------------------------------------------------------|--------|
| <p>There was a wide variation in the amount of botuliumtoxin per muscle group used from 10 to 50 units per muscle group. Units per muscle group depends on how many muscle groups are being targeted but is somewhere between 10-40 units per muscle group not to exceed 360 units in 3 months.</p>                                                                                                                                                                                                                                                                                                                                                                              | 8 (73) |
| <p><i>Vaginal Muscle Relaxants</i></p>                                                                                                                                                                                                                                                                                                                                                                                                                                                                                                                                                                                                                                           |        |
| <p>Vaginal administration of benzodiazepines, such as diazepam, may reduce pelvic floor muscle tone. Although individual response is variable, it is worth a trial given low risk and invasiveness of therapy.</p>                                                                                                                                                                                                                                                                                                                                                                                                                                                               | 8 (73) |
| <p>Studies have shown that vaginally administered diazepam results in lower peak serum plasma concentrations, and longer half-life, resulting in fewer side effects. Thus, vaginal administration is preferred over oral administration.</p>                                                                                                                                                                                                                                                                                                                                                                                                                                     | 8 (73) |
| <p>Which of the following vaginal muscle relaxants do you use? Diazepam</p>                                                                                                                                                                                                                                                                                                                                                                                                                                                                                                                                                                                                      | 8 (73) |
| <p><i>Cognitive Behavioral Therapy</i></p>                                                                                                                                                                                                                                                                                                                                                                                                                                                                                                                                                                                                                                       |        |
| <p>80% of respondents believed that psychological counseling or CBT should be offered at some point in the treatment algorithm. Do you feel patients should be offered CBT or psychological counseling as part of the initial assessment after diagnosis of HTPFD is made, OR should it be a second line option if no improvement is made with PFPT. Second line</p>                                                                                                                                                                                                                                                                                                             | 8 (73) |
| <p><i>Tender Point Injections (TPI)</i></p>                                                                                                                                                                                                                                                                                                                                                                                                                                                                                                                                                                                                                                      |        |
| <p>There was a mixed response on the use of pudendal blocks in HTPFD. Respondents felt that pudendal blocks should only be used if there are signs of pudendal neuralgia or as a diagnostic tool to see if the process is peripheral or sympathetically maintained. Others felt this is to treat a different pathophysiology that HTPFD. Pudendal blocks do not have role in pure high-tone pelvic floor dysfunction.</p>                                                                                                                                                                                                                                                        | 8 (73) |
| <p><i>Sacral Neuromodulation</i></p>                                                                                                                                                                                                                                                                                                                                                                                                                                                                                                                                                                                                                                             |        |
| <p>There was a mixed response to the use of sacral neuromodulation (SNM) for HTPFD. 60% of respondents believed it should be included in the treatment algorithm in some capacity however due to the invasiveness of the procedure it should be reserved as a “last resort” option, after trial of less invasive options. Studies have shown the utility of SNM in patients with chronic pelvic or bladder pain with improvement in pelvic pain and urgency with 80% satisfaction (Marinkovic, 2011). The goal of SNM is to target LUT symptoms as well as pelvic pain. Do you agree with the use of SNM as a 4th line option for HTPFD after other options have been tried?</p> | 9 (82) |

| <i>Therapies Not to Include</i>                                                                                                |                         |
|--------------------------------------------------------------------------------------------------------------------------------|-------------------------|
| Home therapies such as stretching, heating pads and yoga should be used as first line therapy for HTPFD.                       | 9 (82)<br>disagreement  |
| At home TENS units can be considered as an alternative to PFPT for treatment of HTPFD.                                         | 10 (91)<br>disagreement |
| <i>Order of therapy</i>                                                                                                        |                         |
| Pelvic floor physical therapy should be first line therapy for high-tone pelvic floor dysfunction.                             | 11 (100)                |
| Vaginal muscle relaxants, TPI, and BTX-A should all be considered second line therapies.                                       | 8 (73)                  |
| Second line treatment options for HTPFD should include (choose 3)<br>Vaginal muscle relaxants, TPIs                            | 8 (73)                  |
| Third line treatment options for HTPFD should include (choose 3) BTX-A                                                         | 8 (73)                  |
| Fourth line treatment options for HTPFD should include (choose 3)<br>Sacral neuromodulation                                    | 8 (73)                  |
| Based on consensus opinions determined from Questionnaire 1, the treatment algorithm should include PFPT as first line option. | 9 (82)                  |

479

480

481 Table 2 – Vaginal Muscle Relaxant Options

| <b>Medication</b> | <b>Dosing Options</b>                                     |
|-------------------|-----------------------------------------------------------|
| Diazepam          | 5-10 mg as needed up to three times per day <sup>24</sup> |
| Tizanidine        | 2 to 4 mg at bedtime*                                     |
| Baclofen          | 30mg daily to three times a day*                          |
| Cyclobenzaprine   | 5 to 10mg at bedtime*                                     |

482 \*Based on expert opinion

483 Appendix 1- Statements That Did Not Meet Consensus

484

| Statement                                                                                                                                                                                                                                                                     | No. (%) Agreement (n=11) |
|-------------------------------------------------------------------------------------------------------------------------------------------------------------------------------------------------------------------------------------------------------------------------------|--------------------------|
| <i>Biofeedback</i>                                                                                                                                                                                                                                                            |                          |
| Women who continue to have moderate to severe symptoms (i.e. interfering with daily activities or sleep) after completion of pelvic floor physical therapy should be treated with biofeedback.                                                                                | 4 (36)                   |
| Biofeedback should be first line for the treatment of HTPFD.                                                                                                                                                                                                                  | 3 (27)                   |
| Biofeedback should be used if PFPT has been tried and success as plateaued or not been achieved.                                                                                                                                                                              | 6 (55)                   |
| There is a standard protocol that is used for biofeedback?                                                                                                                                                                                                                    | 2 (18)                   |
| If pelvic floor EMG biofeedback is available in the clinician's office (i.e. urostym) it can be considered as an alternative to PFPT particularly for patients who cannot access PFPT.                                                                                        | 3 (27)                   |
| <i>Vaginal Muscle Relaxants</i>                                                                                                                                                                                                                                               |                          |
| For patients who cannot afford compounded vaginal muscle relaxants, oral muscle relaxants are the best alternative.                                                                                                                                                           | 2 (18)                   |
| For patients who cannot afford compounded vaginal muscle relaxants, oral muscle relaxants placed vaginally are the best alternative.                                                                                                                                          | 3 (27)                   |
| Vaginal muscle relaxants should be tried before pelvic floor TPI or BTX-A is considered.                                                                                                                                                                                      | 4 (36)                   |
| Vaginal muscle relaxants should be used in conjunction with PFPT for the treatment of HPTFD.                                                                                                                                                                                  | 4 (36)                   |
| <i>BTX-A and TPI</i>                                                                                                                                                                                                                                                          |                          |
| BTX-A ideally should be combined with a local anesthetic like Marcaine. The anesthetic portion can be helpful if the HTPFM is due to a sensory pain trigger at the periphery that can be blocked. Thus, the person can learn to relax the muscle once the trigger is removed. | 6 (55)                   |
| Ideal timing of TPI is injection in the physician's office followed by an immediate PT session within 1 hour.                                                                                                                                                                 | 3 (27)                   |
| 60% of respondents agreed that BTX-A should be considered in conjunction with PFPT if there is a plateau in improvement. In this situation BTX-A should be considered based on the recommendation by PFPT.                                                                    | 7 (64)                   |
| BTX-A or TPI are more effective than vaginal muscle relaxants and thus should be tried first.                                                                                                                                                                                 | 3 (27)                   |

|                                                                                                                                                                                                                                                                                               |              |
|-----------------------------------------------------------------------------------------------------------------------------------------------------------------------------------------------------------------------------------------------------------------------------------------------|--------------|
| Injection of local anesthetic to hypertonic muscles should be used in conjunction with BTX-A.                                                                                                                                                                                                 | 7 (64)       |
| Injection of local anesthetic to hypertonic muscles helps treat HTPFD.                                                                                                                                                                                                                        | 6 (55)       |
| How many units of BTX-A should be used per muscle group?                                                                                                                                                                                                                                      | No consensus |
| Pudendal blocks should be used in conjunction with BTX-A injections to the pelvic floor.                                                                                                                                                                                                      | 0 (0)        |
| To determine a patient's response to BTX-A injections, an initial trial in the office of an injection into the hypertonic muscle should be used. If there is improvement, then BTX-A should be used for subsequent injections. If no improvement alternative therapies should be recommended. | 3 (27)       |
| Injection of BTX-A into hypertonic pelvic floor muscles should only be used in patients who are refractory to biofeedback, PFPT and vaginal muscle relaxants.                                                                                                                                 | 6 (55)       |
| <i>Sacral Neuromodulation</i>                                                                                                                                                                                                                                                                 |              |
| Sacral neuromodulation should be considered if patient has failed home therapy, biofeedback, pelvic floor physical therapy, vaginal muscle relaxants and TPIs.                                                                                                                                | 5 (45)       |
| Sacral neuromodulation should be considered if patients have failed PFPT.                                                                                                                                                                                                                     | 4 (36)       |
| <i>Alternative Therapies</i>                                                                                                                                                                                                                                                                  |              |
| Women with minimal or no improvement with PFPT should be reassessed and referred for evaluation with a psychiatrist or orthopedist to assess for extra-pelvic sources of pain.                                                                                                                | 5 (45)       |
| There is evidence to support the use of home therapies such as stretching, heating pads and yoga for the treatment of HTPFD.                                                                                                                                                                  | 5 (45)       |
| At home TENS units have a role in the treatment of HTPFD.                                                                                                                                                                                                                                     | 2 (18)       |

485

486

487

488



# Treatment Algorithm for High Tone Pelvic Floor Dysfunction

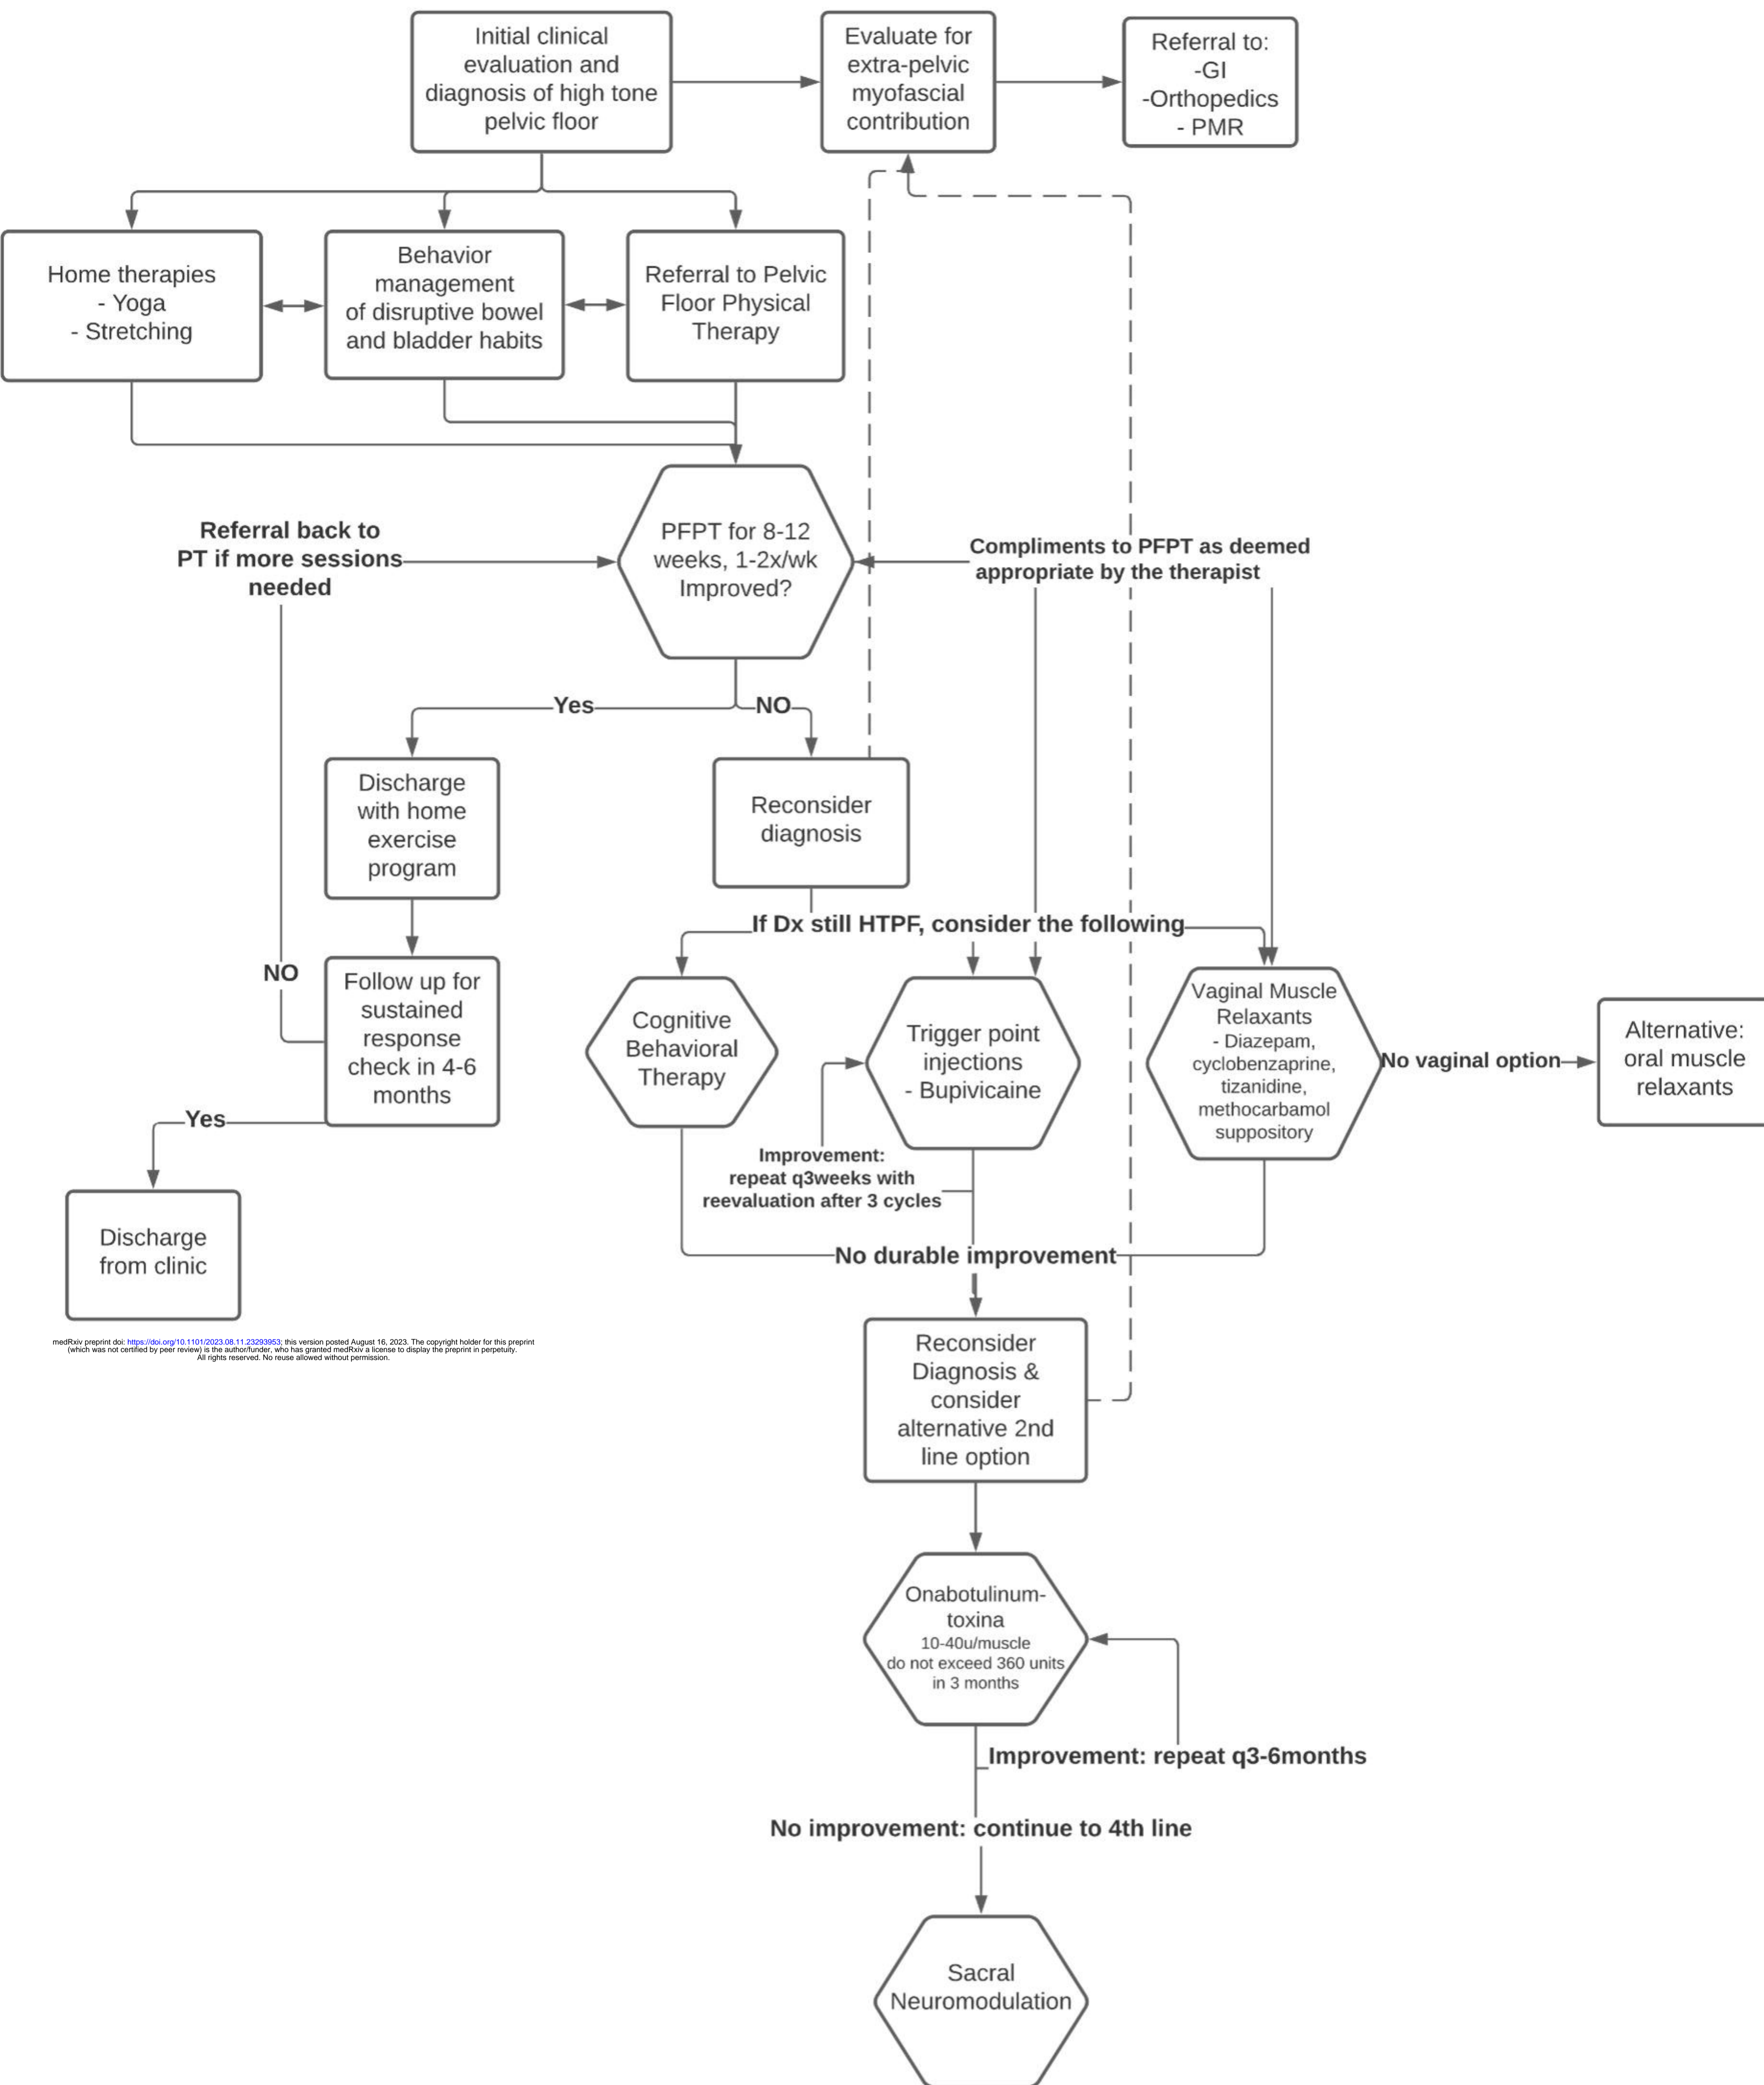

medRxiv preprint doi: <https://doi.org/10.1101/2023.08.11.23293953>; this version posted August 16, 2023. The copyright holder for this preprint (which was not certified by peer review) is the author/funder, who has granted medRxiv a license to display the preprint in perpetuity. All rights reserved. No reuse allowed without permission.

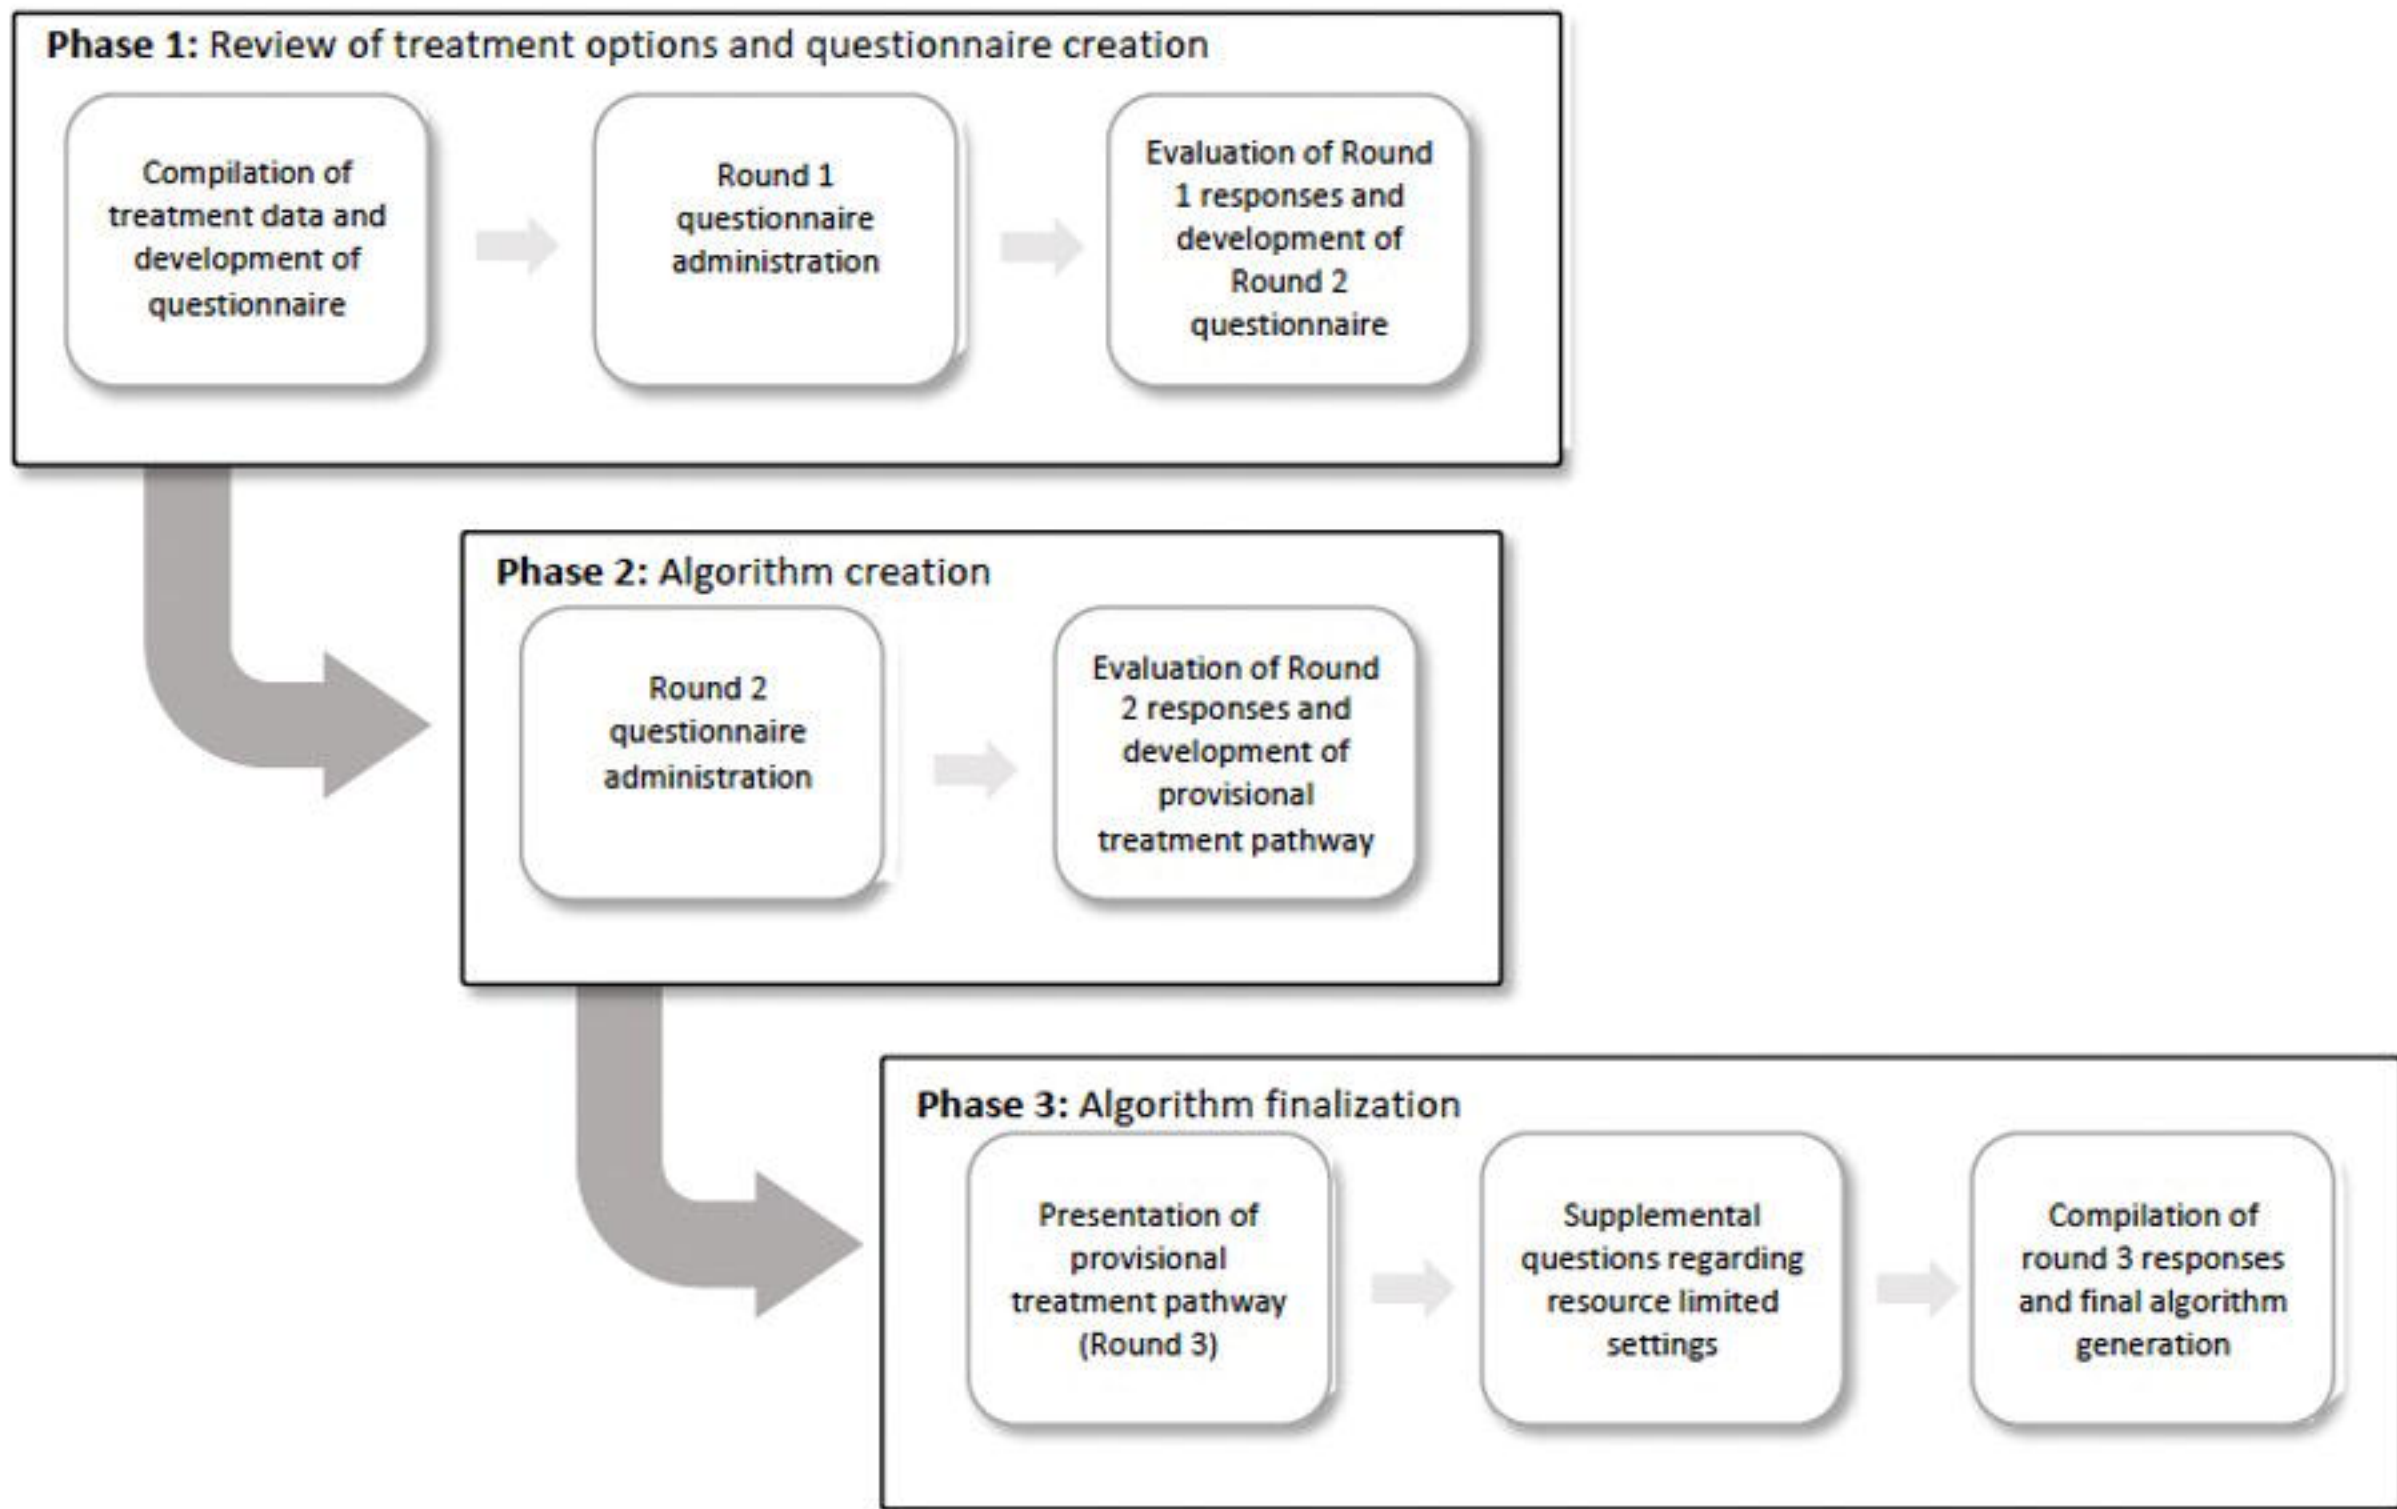

**Figure 1:** Diagrammatic overview of modified Delphi process
